# Supplementary material for: Field-effect pump: liquid dielectrophoresis along a virtual microchannel with source-gate-drain electric fields
Source: Royal Society of Chemistry journal article supplement (doi:10.1039/d0lc01268h), 2021-01-01
Supplement: d0lc01268h1.pdf [file d0lc01268h1.pdf]

# Electronic Supplementary Information

## Field-Effect Pump: Liquid Dielectrophoresis along a Virtual Microchannel with Source-Gate-Drain Electric Fields

Fu-Min Wang<sup>1†</sup>, I-Pei Lu<sup>2†</sup>, Chih-Ting Lin<sup>1</sup>, Shey-Shi Lu<sup>1</sup> and Shih-Kang Fan<sup>3\*</sup>

<sup>1</sup>Graduate Institute of Electronics Engineering, National Taiwan University, Taipei 10617, Taiwan

<sup>2</sup>Institute of Nanotechnology, National Chiao Tung University, Hsinchu 30010, Taiwan

<sup>3</sup>Department of Mechanical and Nuclear Engineering, Kansas State University, Manhattan, KS 66506, USA

†These authors contributed equally.

\*email: [skfan@ksu.edu](mailto:skfan@ksu.edu)

### Video S1: Field-effect pumping

Video of Fig. 2(a)-2(h) showing repeatedly pumping of the liquid back and forth between the source and drain electrodes along a virtual microchannel with the dimensions of  $(L, W, H) = (1500, 50, 50 \mu\text{m})$  and the pumping voltage set of  $(V_S, V_G, V_D) = (45, 100, 85 \text{ V})$ . The video is played at 2x speed.

### Video S2: Narrowing and tapering of the virtual microchannel with insufficient $\Delta E^2_{GD}$

Video of Fig. 3(a) and 3(b) showing receding of the liquid boundary of a virtual microchannel (designed dimensions of  $(L, W, H) = (1500, 50, 50 \mu\text{m})$ ) from the gate electrode boundary because of the insufficient  $\Delta E^2_{GD}$  with the pumping voltage set of  $(V_S, V_G, V_D) = (45, 70, 85 \text{ V})$ .

### Video S3: Repeated pinch-off and replenishment with insufficient $\Delta E^2_{GD}$ and large $\Delta E^2_{DS}$

Video of Fig. 3(e) and 3(f) showing repeated pinch-off and replenishment of a virtual microchannel (designed dimensions of  $(L, W, H) = (1500, 50, 50 \mu\text{m})$ ) because of the insufficient  $\Delta E^2_{GD}$  and great  $\Delta E^2_{DS}$  with the pumping voltage set of  $(V_S, V_G, V_D) = (45, 100, 230 \text{ V})$ . The video is played at 0.5x speed.

**Table S1** Field-effect pumping parameters and values along a virtual microchannel with various dimensions and  $V_D$  using fixed  $(V_S, V_G) = (45, 100 \text{ V})$ .

| $L$<br>( $\mu\text{m}$ ) | $W$<br>( $\mu\text{m}$ ) | $H$<br>( $\mu\text{m}$ ) | $V_D$ (V) | $\Delta E_{DS}^2$<br>( $\text{V}^2/\mu\text{m}^2$ ) | $\Delta P_{LDEP,DS}$<br>(Pa) | $Q$ (nL/s) | Velocity<br>(mm/s) | Re   | $R$<br>(Pa·s/nL) | $R_{hyd}^a$<br>(Pa·s/nL) |
|--------------------------|--------------------------|--------------------------|-----------|-----------------------------------------------------|------------------------------|------------|--------------------|------|------------------|--------------------------|
| 1000                     | 50                       | 50                       | 65        | 0.88                                                | 301.8                        | 105.0      | 42.0               | 2.35 | 2.87             | 1.92                     |
|                          |                          |                          | 75        | 1.44                                                | 493.8                        | 182.5      | 73.0               | 4.08 | 2.71             |                          |
|                          |                          |                          | 85        | 2.08                                                | 713.3                        | 259.2      | 103.7              | 5.80 | 2.75             |                          |
| 1500                     | 50                       | 50                       | 65        | 0.88                                                | 301.8                        | 61.5       | 24.6               | 1.38 | 4.91             | 2.88                     |
|                          |                          |                          | 75        | 1.44                                                | 493.8                        | 113.2      | 45.3               | 2.53 | 4.36             |                          |
|                          |                          |                          | 85        | 2.08                                                | 713.3                        | 154.3      | 61.7               | 3.45 | 4.62             |                          |
| 2000                     | 50                       | 50                       | 65        | 0.88                                                | 301.8                        | 45.6       | 18.2               | 1.02 | 6.62             | 3.84                     |
|                          |                          |                          | 75        | 1.44                                                | 493.8                        | 80.5       | 32.2               | 1.80 | 6.13             |                          |
|                          |                          |                          | 85        | 2.08                                                | 713.3                        | 117.0      | 46.8               | 2.62 | 6.10             |                          |
| 2000                     | 50                       | 25                       | 65        | 3.52                                                | 1207.1                       | 13.4       | 10.7               | 0.40 | 89.87            | 30.72                    |
|                          |                          |                          | 75        | 5.76                                                | 1975.3                       | 25.7       | 20.5               | 0.77 | 76.92            |                          |
|                          |                          |                          | 85        | 8.32                                                | 2853.2                       | 36.4       | 29.1               | 1.09 | 78.41            |                          |
| 2000                     | 50                       | 75                       | 65        | 0.39                                                | 134.1                        | 81.2       | 21.7               | 1.45 | 1.65             | 1.14                     |
|                          |                          |                          | 75        | 0.64                                                | 219.5                        | 127.1      | 33.9               | 2.27 | 1.73             |                          |
|                          |                          |                          | 85        | 0.92                                                | 317.0                        | 179.0      | 47.7               | 3.20 | 1.77             |                          |
| 2000                     | 100                      | 50                       | 65        | 0.88                                                | 301.8                        | 70.8       | 14.2               | 1.06 | 4.26             | 1.92                     |
|                          |                          |                          | 75        | 1.44                                                | 493.8                        | 117.5      | 23.5               | 1.75 | 4.20             |                          |
|                          |                          |                          | 85        | 2.08                                                | 713.3                        | 168.7      | 33.7               | 2.52 | 4.23             |                          |
| 2000                     | 150                      | 50                       | 65        | 0.88                                                | 301.8                        | 86.7       | 11.6               | 0.97 | 3.48             | 1.28                     |
|                          |                          |                          | 75        | 1.44                                                | 493.8                        | 153.6      | 20.5               | 1.72 | 3.22             |                          |
|                          |                          |                          | 85        | 2.08                                                | 713.3                        | 222.0      | 29.6               | 2.48 | 3.21             |                          |

<sup>a</sup>  $R_{hyd} = \frac{12\mu L}{WH^3}$  when neglecting side walls [28].

### Pumping pressure $\Delta P_{LDEP,DS}$

The configuration of the designed FEP is shown in Fig. S1. Assuming the liquid (droplet) was initially filled the rectangular source electrode (between 0 and 3). The liquid was then pumped into the gate electrode (between 1 and 4). The gate electrode area  $A_G$  is equivalent to  $W_S L_1$ . The liquid was subsequently pumped a distance  $x$  into the drain electrode (between 2 and 5). The cross-sectional view of the device shows the silicone oil (surrounding medium with relative permittivity  $\epsilon_M$ ) and pumped liquid (relative permittivity  $\epsilon_L$ ) between the

parallel plates. The FEP can be considered as two liquids in three capacitors. The voltage drop mainly occurs across the liquids for every capacitor. The source capacitance includes the capacitance of surrounding medium in the source field  $C_{SM}$  and the capacitance of pumping liquid in the source field  $C_{SL}$ . The gate capacitance is  $C_G$ . The drain capacitance includes the capacitance of surrounding medium in the drain field  $C_{DM}$  and the capacitance of pumping liquid in the drain field  $C_{DL}$ . The total electric energy  $U$  of the system is:

$$U = \frac{1}{2}(C_{SM} + C_{SL})V_s^2 + \frac{1}{2}C_G V_G^2 + \frac{1}{2}(C_{DL} + C_{DM})V_D^2$$

$$= \frac{1}{2}\left(\frac{\epsilon_o\epsilon_M W_S(L_1+x)}{H} + \frac{\epsilon_o\epsilon_L W_S(L_S-L_1-x)}{H}\right)V_s^2 + \frac{1}{2}\frac{\epsilon_o\epsilon_L A_G}{H}V_G^2 + \frac{1}{2}\left(\frac{\epsilon_o\epsilon_L W_D x}{H} + \frac{\epsilon_o\epsilon_M W_D(L_D-x)}{H}\right)V_D^2. \quad (S1)$$

Using the virtual work theorem with  $W_S$  equals  $W_D$ , the pumping force  $F_{LDEP,DS}$  is given by:

$$F_{LDEP,DS} = \frac{\partial U}{\partial x} = \frac{\epsilon_o(\epsilon_L-\epsilon_M)W_D}{2H}V_D^2 - \frac{\epsilon_o(\epsilon_L-\epsilon_M)W_S}{2H}V_s^2 = F_D - F_S = \frac{\epsilon_o(\epsilon_L-\epsilon_M)W_D}{2H}(V_D^2 - V_s^2). \quad (S2)$$

The pressure difference between the source and the drain provides the pumping pressure  $\Delta P_{LDEP,DS}$  that can be expressed as:

$$\Delta P_{LDEP,DS} = P_{L,S} - P_{L,D} = \frac{F_D - F_S}{W_D H} = \frac{\epsilon_o(\epsilon_L-\epsilon_M)}{2}(E_D^2 - E_S^2) = \epsilon_{LDEP}\Delta E_{DS}^2. \quad (S3)$$

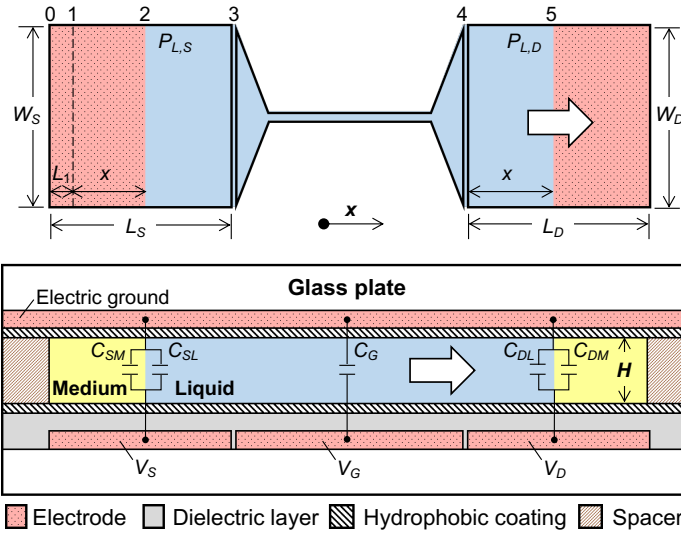

**Fig. S1 Configuration of the designed FEP for pumping pressure  $\Delta P_{LDEP,DS}$  derivation.**

## Analysis of flow rate $Q$

The recorded video AVI files were analyzed with a LabVIEW software we developed with the NI Vision Assistant module (National Instruments) as shown in Fig. S2. As shown in Fig. S2(a), in the software window, we first imported a video for analysis and also entered some key parameters, including the gap size between parallel plates, counting time and file name of the exporting excel spreadsheet. We then selected the desired counting area (region of interest), shown as a green rectangle covering the drain area in Fig. S2(b), for computing the liquid volume variation in the drain and started the program. The user can choose either drain or source area to compute the liquid volume variation.

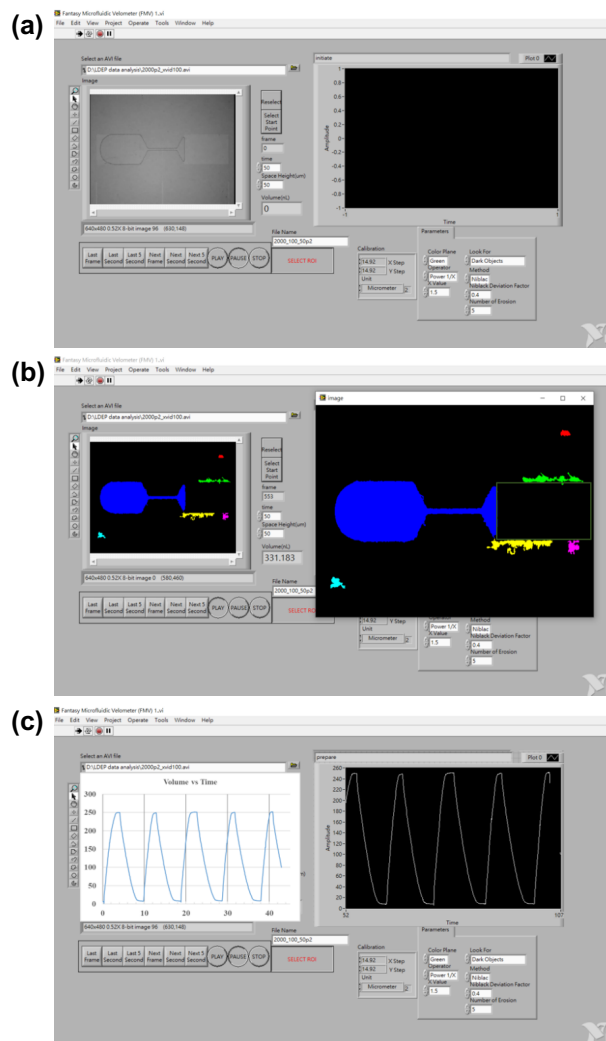

**Fig. S2 LabVIEW software developed with the NI Vision Assistant module (National Instruments) to analyze the flow rate  $Q$  from the recorded video AVI files. (a) Importing file and inputting parameters. (b) Selecting region of interest for volume variation analysis. (c) Exporting data and plot.**

After analyzing the imported video, the software generated an Excel file and a plot of the pumping volume versus time as shown in Fig. S2(c). In this example, there were five pumping cycles in the imported video and the slope of every rising segment of the curve represented the flow rate  $Q$  of the liquid flowing into the drain reservoir. The average volume flow rate is calculated by averaging all the volume flow rates.

### FEP wiring

The wiring configuration of the designed FEP is shown in Fig. S3. The wiring electrodes were connected to the electrodes via a narrow region as a flow stopper adjacent to the electrodes. The width of the narrow region should be minimized to increase the aspect ratio of the local electric field for a reduced LDEP force to avoid liquid pumping on the wiring electrodes [18]. In our design, the narrow region with a width of  $15\ \mu\text{m}$  was small enough to efficiently stop the liquid flow toward the connecting wires whereas supplying adequate voltage to the thin gate electrode (widths  $50$ ,  $100$  and  $150\ \mu\text{m}$ ). Because the gate electrode had the greatest voltage, the position of the narrow region may influence the geometry of the virtual microchannel. As shown in Fig. S3, when the connecting wire connects the gate electrode from the center (shown 1), the virtual microchannel may slightly deform at the narrow region. The concern can be addressed by placing the narrow region at the converging (shown 2) or diverging (shown 2') portion.

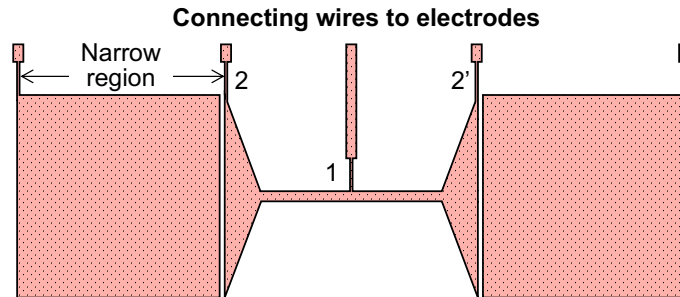

**Fig. S3 Wiring configuration of the designed FEP.** The connecting wires providing driving voltage to the electrodes with a narrow region as a flow stopper adjacent to the electrodes to prevent liquid pumping toward the connecting wires. For the gate electrode, the connecting wire can be placed at the center (shown 1) or at the conversion or the diversion portion (shown 2 or 2').
